# Supplementary material for: Leveraging National Germplasm Collections to Determine Significantly Associated Categorical Traits in Crops: Upland and Pima Cotton as a Case Study
Source: Front Plant Sci. 2022 Apr 26;13:837038. doi: 10.3389/fpls.2022.837038 (PMC9087864; doi:10.3389/fpls.2022.837038)
Supplement: Supplementary Table 8 — Two cluster results and IDs identified. [file Table_6.XLSX]

## Sheet: final_2_clusters_one-hot
Table S8: Accesion IDs of the clusters reported for the two-cluster analysis (Gb cluster: 0. Gh "SA and TEX" cluster: 1)
IDENT	cluster
GB-0002	0
GB-0023	0
GB-0027	0
GB-0047	0
GB-0080	0
GB-0084	0
GB-0085	0
GB-0089	0
GB-0128	0
GB-0130	0
GB-0131	0
GB-0132	0
GB-0133	0
GB-0134	0
GB-0135	0
GB-0138	0
GB-0139	0
GB-0152	0
GB-0156	0
GB-0160	0
GB-0163	0
GB-0167	0
GB-0171	0
GB-0175	0
GB-0177	0
GB-0178	0
GB-0180	0
GB-0184	0
GB-0193	0
GB-0195	0
GB-0198	0
GB-0199	0
GB-0205	0
GB-0214	0
GB-0223	0
GB-0226	0
GB-0227	0
GB-0228	0
GB-0229	0
GB-0234	0
GB-0235	0
GB-0236	0
GB-0237	0
GB-0238	0
GB-0240	0
GB-0241	0
GB-0242	0
GB-0244	0
GB-0245	0
GB-0249	0
GB-0250	0
GB-0251	0
GB-0252	0
GB-0253	0
GB-0255	0
GB-0257	0
GB-0258	0
GB-0259	0
GB-0260	0
GB-0262	0
GB-0271	0
GB-0280	0
GB-0288	0
GB-0292	0
GB-0293	0
GB-0316	0
GB-0317	0
GB-0333	0
GB-0348	0
GB-0359	0
GB-0364	0
GB-0389	0
GB-0391	0
GB-0394	0
GB-0427	0
GB-0435	0
GB-0446	0
GB-0451	0
GB-0464	0
GB-0507	0
GB-0512	0
GB-0538	0
GB-0539	0
GB-0566	0
GB-0570	0
GB-0582	0
GB-0603	0
GB-0605	0
GB-0621	1
GB-0622	0
GB-0627	0
GB-0629	0
GB-0638	0
GB-0648	0
GB-0649	0
GB-0650	0
GB-0651	0
GB-0652	0
GB-0653	0
GB-0654	0
GB-0656	0
GB-0657	0
GB-0658	0
GB-0659	0
GB-0662	0
GB-0677	0
GB-0678	0
GB-0679	0
GB-0680	0
GB-0681	0
GB-0682	0
GB-0683	0
GB-0684	0
GB-0685	0
GB-0686	0
GB-0695	0
GB-0696	0
GB-0697	0
GB-0699	0
GB-0701	0
GB-0702	0
GB-0703	0
GB-0704	0
GB-0707	0
GB-0712	0
GB-0718	0
GB-0726	0
GB-0727	0
GB-0728	0
GB-0729	0
GB-0730	0
GB-0731	0
GB-0734	0
GB-0735	0
GB-0737	0
GB-0738	0
GB-0739	0
GB-0740	0
GB-0741	0
GB-0742	0
GB-0743	0
GB-0744	0
GB-0745	0
GB-0746	0
GB-0750	1
GB-0762	0
GB-0768	0
GB-0779	0
GB-0780	0
GB-0782	0
GB-0783	0
GB-0784	0
GB-0785	0
GB-0786	0
GB-0791	0
GB-0792	0
GB-0795	0
GB-0796	0
GB-0799	0
GB-0803	0
GB-0805	0
GB-0807	0
GB-0808	0
GB-0816	0
GB-0817	0
GB-0849	0
GB-0851	0
GB-0853	0
GB-0855	0
GB-0856	0
GB-0857	0
GB-0859	0
GB-0860	0
GB-0861	0
GB-0961	0
GB-0991	0
GB-0992	0
GB-0993	0
GB-0994	0
GB-0995	0
GB-0996	0
GB-0997	0
GB-0998	0
GB-0999	0
GB-1000	0
GB-1001	0
GB-1002	0
GB-1003	0
GB-1004	0
GB-1006	1
GB-1009	1
GB-1023	0
GB-1025	0
GB-1026	0
GB-1027	0
GB-1028	0
GB-1030	0
GB-1032	0
GB-1040	1
GB-1042	0
GB-1049	0
GB-1050	0
GB-1052	0
GB-1053	0
GB-1054	0
GB-1055	0
GB-1056	0
GB-1057	0
GB-1058	0
GB-1059	0
GB-1062	0
GB-1065	0
GB-1071	0
GB-1072	0
GB-1075	0
GB-1076	0
GB-1081	0
GB-1086	0
GB-1087	0
GB-1093	0
GB-1094	0
GB-1097	0
GB-1098	0
GB-1099	1
GB-1102	0
GB-1103	0
GB-1109	0
GB-1111	0
GB-1113	0
GB-1114	0
GB-1116	0
GB-1117	0
GB-1119	0
GB-1120	0
GB-1122	0
GB-1123	0
GB-1124	0
GB-1125	0
GB-1126	0
GB-1127	0
GB-1128	0
GB-1129	0
GB-1130	0
GB-1131	0
GB-1132	0
GB-1133	0
GB-1134	0
GB-1135	0
GB-1136	0
GB-1137	0
GB-1138	0
GB-1139	0
GB-1141	0
GB-1142	0
GB-1143	0
GB-1144	0
GB-1145	0
GB-1146	0
GB-1148	0
GB-1151	0
GB-1153	0
GB-1154	0
GB-1155	0
GB-1157	0
GB-1158	0
GB-1159	0
GB-1160	0
GB-1161	0
GB-1162	0
GB-1163	0
GB-1165	0
GB-1166	0
GB-1167	0
GB-1168	0
GB-1169	0
GB-1170	0
GB-1171	0
GB-1172	0
GB-1174	0
GB-1175	0
GB-1176	0
GB-1177	0
GB-1179	0
GB-1180	0
GB-1182	0
GB-1183	0
GB-1184	0
GB-1186	0
GB-1187	0
GB-1188	0
GB-1189	0
GB-1190	0
GB-1191	0
GB-1192	0
GB-1193	0
GB-1194	0
GB-1195	0
GB-1196	0
GB-1197	0
GB-1198	0
GB-1199	0
GB-1200	0
GB-1201	0
GB-1202	0
GB-1203	0
GB-1204	0
GB-1205	0
GB-1206	0
GB-1207	0
GB-1208	0
GB-1209	0
GB-1210	0
GB-1211	0
GB-1212	0
GB-1213	0
GB-1214	0
GB-1215	0
GB-1216	0
GB-1217	0
GB-1218	0
GB-1220	0
GB-1222	0
GB-1223	0
GB-1224	0
GB-1225	0
GB-1227	0
GB-1228	0
GB-1229	0
GB-1230	0
GB-1231	0
GB-1232	0
GB-1233	0
GB-1234	0
GB-1235	0
GB-1239	0
GB-1240	0
GB-1241	0
GB-1242	0
GB-1243	0
GB-1244	0
GB-1245	0
GB-1246	0
GB-1247	0
GB-1248	0
GB-1249	0
GB-1250	0
GB-1251	0
GB-1252	0
GB-1253	0
GB-1254	0
GB-1255	0
GB-1256	0
GB-1257	0
GB-1259	0
GB-1261	0
GB-1262	0
GB-1264	0
GB-1265	0
GB-1266	0
GB-1267	0
GB-1268	0
GB-1269	0
GB-1271	0
GB-1272	0
GB-1273	0
GB-1274	0
GB-1276	0
GB-1278	0
GB-1280	0
GB-1281	0
GB-1282	0
GB-1283	0
GB-1285	0
GB-1287	0
GB-1288	0
GB-1289	0
GB-1290	0
GB-1291	0
GB-1294	0
GB-1296	0
GB-1297	0
GB-1298	0
GB-1299	0
GB-1300	0
GB-1301	0
GB-1302	0
GB-1303	0
GB-1304	0
GB-1305	0
GB-1306	0
GB-1307	0
GB-1308	0
GB-1309	0
GB-1310	0
GB-1311	0
GB-1313	0
GB-1315	0
GB-1316	0
GB-1319	0
GB-1323	0
GB-1330	0
GB-1331	0
GB-1332	0
GB-1334	0
GB-1335	0
GB-1336	0
GB-1337	0
GB-1338	0
GB-1339	0
GB-1340	0
GB-1341	0
GB-1342	0
GB-1343	0
GB-1344	0
GB-1345	0
GB-1347	0
GB-1348	0
GB-1349	0
GB-1350	0
GB-1352	0
GB-1353	0
GB-1354	0
GB-1355	0
GB-1359	0
GB-1364	0
GB-1365	0
GB-1366	0
GB-1367	0
GB-1368	0
GB-1369	0
GB-1370	0
GB-1371	0
GB-1372	0
GB-1373	0
GB-1374	0
GB-1375	0
GB-1383	0
GB-1384	0
GB-1385	0
GB-1386	0
GB-1387	0
GB-1388	0
GB-1389	0
GB-1390	0
GB-1392	0
GB-1393	0
GB-1396	0
GB-1397	0
GB-1400	0
GB-1405	0
GB-1406	0
GB-1410	0
GB-1411	0
GB-1412	0
GB-1413	0
GB-1416	0
GB-1418	0
GB-1420	0
GB-1424	0
GB-1425	0
GB-1426	0
GB-1427	0
GB-1428	0
GB-1429	0
GB-1431	0
GB-1432	0
GB-1435	0
GB-1436	0
GB-1438	0
GB-1439	0
GB-1441	0
GB-1444	0
GB-1445	0
GB-1446	0
GB-1447	0
GB-1448	0
GB-1451	0
GB-1457	0
GB-1458	0
GB-1461	0
GB-1462	0
GB-1463	0
GB-1464	0
GB-1465	0
GB-1466	0
GB-1469	0
GB-1471	0
GB-1472	0
GB-1477	0
GB-1478	0
GB-1479	0
GB-1480	0
GB-1484	0
GB-1486	0
GB-1487	0
GB-1488	0
GB-1491	0
GB-1492	0
GB-1493	0
GB-1495	0
GB-1496	0
GB-1499	0
GB-1500	0
GB-1504	0
GB-1505	0
GB-1507	0
GB-1508	0
GB-1509	0
GB-1512	0
GB-1513	0
GB-1514	0
GB-1516	0
GB-1519	0
GB-1520	0
GB-1521	0
GB-1526	0
GB-1529	0
GB-1530	0
GB-1532	0
GB-1536	0
GB-1537	0
GB-1538	0
GB-1539	0
GB-1540	0
GB-1541	0
GB-1543	0
GB-1544	0
GB-1545	0
GB-1546	0
GB-1547	0
GB-1549	0
GB-1550	0
GB-1552	0
GB-1555	0
GB-1556	0
GB-1557	0
GB-1559	0
GB-1560	0
GB-1566	0
GB-1567	0
GB-1570	0
GB-1572	0
GB-1573	0
GB-1574	0
GB-1575	0
GB-1580	0
GB-1582	0
GB-1583	0
GB-1596	0
GB-1601	0
GB-1602	0
GB-1603	0
SA-0003	1
SA-0005	1
SA-0008	1
SA-0015	1
SA-0025	1
SA-0038	1
SA-0040	1
SA-0041	1
SA-0065	1
SA-0165	1
SA-0186	1
SA-0222	1
SA-0736	1
SA-0737	1
SA-0744	1
SA-0832	1
SA-0840	1
SA-0866	1
SA-0874	1
SA-0887	1
SA-0895	1
SA-0899	1
SA-0902	1
SA-0907	1
SA-0936	1
SA-0937	1
SA-0939	1
SA-0944	1
SA-0945	1
SA-0950	1
SA-0958	1
SA-0964	1
SA-0967	1
SA-0969	1
SA-0976	1
SA-0978	1
SA-0979	1
SA-0990	1
SA-0991	1
SA-0992	1
SA-0993	1
SA-1003	1
SA-1009	1
SA-1015	1
SA-1017	1
SA-1022	1
SA-1034	1
SA-1038	1
SA-1042	1
SA-1047	1
SA-1056	1
SA-1057	1
SA-1063	1
SA-1068	1
SA-1072	1
SA-1075	1
SA-1077	1
SA-1081	1
SA-1083	1
SA-1096	1
SA-1098	1
SA-1100	1
SA-1102	1
SA-1109	1
SA-1121	1
SA-1125	1
SA-1126	1
SA-1127	1
SA-1130	1
SA-1131	1
SA-1132	1
SA-1158	1
SA-1160	1
SA-1184	1
SA-1200	1
SA-1210	1
SA-1236	1
SA-1451	1
SA-1460	1
SA-1531	1
SA-1620	1
SA-1710	1
SA-1797	1
SA-1845	1
SA-1913	1
SA-2131	1
SA-2133	1
SA-2219	1
SA-2221	1
SA-2242	1
SA-2243	1
SA-2257	1
SA-2494	0
SA-2518	1
SA-2552	0
SA-2606	1
SA-2788	1
SA-2789	1
SA-2790	1
SA-2792	1
SA-2793	1
SA-2798	1
SA-2801	1
SA-2803	1
SA-2805	1
SA-2807	1
SA-2809	1
SA-2813	1
SA-2814	1
SA-2816	1
SA-2818	1
SA-2825	1
SA-2830	1
SA-2832	1
SA-2833	1
SA-2836	1
SA-2837	1
SA-2838	1
SA-2841	1
SA-2845	1
SA-2847	1
SA-2848	1
SA-2852	1
SA-2854	1
SA-2856	1
SA-2857	1
SA-2858	1
SA-2859	1
SA-2861	1
SA-2862	1
SA-2863	1
SA-2864	1
SA-2867	1
SA-2868	1
SA-2870	1
SA-2875	1
SA-2876	1
SA-2879	1
SA-2880	1
SA-2882	1
SA-2884	1
SA-2886	1
SA-2887	1
SA-2888	1
SA-2890	1
SA-2891	1
SA-2919	1
SA-2922	1
SA-2925	1
SA-2926	1
SA-2927	1
SA-2928	1
SA-2929	1
SA-2930	1
SA-2931	1
SA-2932	1
SA-2933	1
SA-2940	1
SA-2941	1
SA-2942	1
SA-2943	1
SA-2946	1
SA-2948	1
SA-2953	1
SA-2956	1
SA-2963	1
SA-2973	1
SA-3006	1
SA-3025	1
SA-3092	1
SA-3093	1
SA-3101	1
SA-3112	1
SA-3129	1
SA-3142	1
SA-3143	1
SA-3156	1
SA-3171	1
SA-3172	1
SA-3173	1
SA-3175	1
SA-3180	1
SA-3181	1
SA-3245	1
SA-3249	1
SA-3255	1
SA-3259	1
SA-3271	1
SA-3279	1
SA-3284	1
SA-3316	1
SA-3323	1
SA-3333	1
SA-3338	1
SA-3348	1
SA-3349	1
SA-3356	1
SA-3385	1
SA-3393	1
SA-3413	1
SA-3415	1
SA-3422	1
SA-3444	1
SA-3452	1
SA-3477	1
SA-3553	1
SA-3559	1
SA-3570	1
SA-3582	1
SA-3585	1
SA-3587	1
SA-3592	1
SA-3593	1
SA-3594	1
SA-3596	1
SA-3599	1
SA-3600	1
SA-3601	1
SA-3608	1
SA-3610	1
SA-3611	1
SA-3612	1
SA-3613	1
SA-3614	1
SA-3615	1
SA-3616	1
SA-3619	1
SA-3620	1
SA-3621	1
SA-3622	1
SA-3625	1
SA-3626	1
SA-3627	1
SA-3628	1
SA-3630	1
SA-3631	1
SA-3661	1
SA-3667	1
SA-3692	1
SA-3693	1
SA-3717	1
SA-3721	1
SA-3722	1
SA-3723	1
SA-3724	1
SA-3725	1
SA-3726	1
SA-3728	1
SA-3729	1
SA-3730	1
SA-3731	1
SA-3734	0
SA-3735	1
SA-3736	1
SA-3737	1
SA-3739	1
SA-3740	1
SA-3745	1
SA-3746	1
SA-3750	1
SA-3751	1
SA-3757	1
SA-3758	1
SA-3771	1
SA-3777	1
SA-3822	1
SA-3823	1
SA-3824	1
SA-3825	1
SA-3829	1
SA-3830	1
SA-3831	1
SA-3877	1
SA-3881	1
TX-0002	1
TX-0016	1
TX-0017	1
TX-0019	1
TX-0020	1
TX-0021	1
TX-0022	1
TX-0024	1
TX-0025	1
TX-0027	1
TX-0029	1
TX-0030	1
TX-0031	1
TX-0033	1
TX-0036	1
TX-0037	1
TX-0038	1
TX-0039	1
TX-0040	1
TX-0041	1
TX-0045	1
TX-0046	1
TX-0048	1
TX-0050	1
TX-0052	1
TX-0053	1
TX-0056	1
TX-0057	1
TX-0060	1
TX-0061	1
TX-0062	1
TX-0063	1
TX-0064	1
TX-0065	1
TX-0066	1
TX-0067	1
TX-0069	1
TX-0072	1
TX-0073	1
TX-0079	1
TX-0080	1
TX-0081	1
TX-0082	1
TX-0083	1
TX-0084	1
TX-0085	1
TX-0087	1
TX-0091	1
TX-0093	1
TX-0094	1
TX-0095	1
TX-0097	1
TX-0098	1
TX-0100	1
TX-0101	1
TX-0102	1
TX-0106	1
TX-0107	1
TX-0109	1
TX-0112	1
TX-0113	1
TX-0117	1
TX-0118	1
TX-0120	1
TX-0121	1
TX-0122	1
TX-0123	0
TX-0124	1
TX-0134	1
TX-0135	1
TX-0140	1
TX-0141	1
TX-0142	1
TX-0143	1
TX-0146	1
TX-0149	1
TX-0151	1
TX-0153	1
TX-0154	1
TX-0160	1
TX-0161	1
TX-0163	1
TX-0164	1
TX-0167	1
TX-0168	1
TX-0169	1
TX-0170	1
TX-0171	1
TX-0176	1
TX-0177	1
TX-0178	1
TX-0180	1
TX-0181	1
TX-0185	1
TX-0187	1
TX-0188	1
TX-0192	1
TX-0195	1
TX-0196	1
TX-0197	1
TX-0201	1
TX-0204	1
TX-0205	1
TX-0207	1
TX-0209	1
TX-0210	1
TX-0219	1
TX-0220	1
TX-0221	1
TX-0222	1
TX-0225	1
TX-0226	1
TX-0230	1
TX-0233	1
TX-0236	1
TX-0239	1
TX-0240	1
TX-0243	1
TX-0244	1
TX-0245	1
TX-0246	1
TX-0248	1
TX-0251	1
TX-0257	1
TX-0263	1
TX-0267	1
TX-0292	1
TX-0294	1
TX-0295	1
TX-0307	1
TX-0343	1
TX-0373	1
TX-0375	1
TX-0380	1
TX-0396	1
TX-0401	1
TX-0406	1
TX-0460	1
TX-0467	1
TX-0469	1
TX-0488	1
TX-0495a	0
TX-0498	1
TX-0503	1
TX-0596	1
TX-0597	1
TX-0600	1
TX-0604	0
TX-0605	1
TX-0606	1
TX-0610	1
TX-0612	1
TX-0616	1
TX-0619	1
TX-0620	1
TX-0621	1
TX-0622	1
TX-0624	1
TX-0625	1
TX-0633	1
TX-0634	1
TX-0635	1
TX-0636	1
TX-0638	1
TX-0641	1
TX-0643	1
TX-0644	1
TX-0645	1
TX-0650	1
TX-0665	1
TX-0672	1
TX-0679	1
TX-0681	1
TX-0684	1
TX-0685	1
TX-0695	1
TX-0701	1
TX-0702	1
TX-0703	1
TX-0704	1
TX-0707	1
TX-0709	1
TX-0711	1
TX-0717	1
TX-0720	1
TX-0728	1
TX-0738	1
TX-0743	1
TX-0749	1
TX-0753	1
TX-0755	0
TX-0756	1
TX-0757	1
TX-0759	1
TX-0761	1
TX-0762	1
TX-0763	1
TX-0764	1
TX-0768	1
TX-0769	1
TX-0773	1
TX-0775	1
TX-0776	1
TX-0795	1
TX-0802	1
TX-0832	1
TX-0883	1
TX-0932	1
TX-0933	1
TX-0940	1
TX-0943	0
TX-0953b	1
TX-0984	1
TX-0989	0
TX-1001	1
TX-1003	1
TX-1004	1
TX-1004a	1
TX-1029	1
TX-1039	1
TX-1043	1
TX-1045	1
TX-1054	1
TX-1063	1
TX-1076	1
TX-1086	1
TX-1096	1
TX-1099	1
TX-1100	1
TX-1101	1
TX-1103	1
TX-1107	1
TX-1109	1
TX-1110	1
TX-1114	1
TX-1119	1
TX-1121	1
TX-1122	1
TX-1123	1
TX-1124	1
TX-1125	1
TX-1126	1
TX-1128	1
TX-1131	1
TX-1134	1
TX-1143	1
TX-1148	1
TX-1149	1
TX-1152	1
TX-1154	1
TX-1156	1
TX-1158	1
TX-1159	1
TX-1160	1
TX-1163	1
TX-1166	1
TX-1168	1
TX-1169	1
TX-1170	1
TX-1171	1
TX-1174	1
TX-1175	1
TX-1177	1
TX-1178	1
TX-1180	1
TX-1189	1
TX-1191	1
TX-1195	1
TX-1196	1
TX-1197	1
TX-1199	1
TX-1200	1
TX-1201	1
TX-1205	1
TX-1210	1
TX-1211	1
TX-1212	1
TX-1213	1
TX-1215	1
TX-1233	1
TX-1237	1
TX-1252	1
TX-1254	1
TX-1258	1
TX-1270	1
TX-1283	1
TX-1291	1
TX-1295	1
TX-1300	1
TX-1301	1
TX-1302	1
TX-1303	1
TX-1305	1
TX-1306	1
TX-1307	1
TX-1308	1
TX-1311	1
TX-1315	1
TX-1316	1
TX-1317	1
TX-1322	1
TX-1323	1
TX-1324	1
TX-1325	1
TX-1326	1
TX-1327	1
TX-1329	1
TX-1331	1
TX-1332	1
TX-1333	1
TX-1334	1
TX-1335	1
TX-1337	1
TX-1338	1
TX-1339	1
TX-1354	1
TX-1365	1
TX-1366	1
TX-1377	1
TX-1378	1
TX-1379	1
TX-1383	0
TX-1387	1
TX-1390	1
TX-1400	1
TX-1401	1
TX-1403	1
TX-1404	1
TX-1405	1
TX-1409	1
TX-1412	1
TX-1413	1
TX-1418	1
TX-1419	1
TX-1420	1
TX-1421	1
TX-1422	1
TX-1426	1
TX-1427	1
TX-1429	1
TX-1430	1
TX-1432	1
TX-1437	1
TX-1438	1
TX-1440	1
TX-1442	1
TX-1443	1
TX-1448	1
TX-1449	1
TX-1453	1
TX-1455	1
TX-1459	0
TX-1460	1
TX-1461	0
TX-1462	1
TX-1463	1
TX-1464	1
TX-1491	1
TX-1509	1
TX-1515	1
TX-1521	1
TX-1522	1
TX-1532	1
TX-1540	1
TX-1546	1
TX-1552	0
TX-1556	1
TX-1568	0
TX-1591	1
TX-1593	0
TX-1597	1
TX-1600	1
TX-1630	1
TX-1642	1
TX-1644	1
TX-1653	1
TX-1658	0
TX-1661	1
TX-1663	1
TX-1675	1
TX-1677	0
TX-1702	1
TX-1712	1
TX-1716	1
TX-1717	1
TX-1718	1
TX-1721	1
TX-1757	1
TX-1759	1
TX-1760	1
TX-1771	1
TX-1801	1
TX-1805	1
TX-1822	1
TX-1832	1
TX-1870	1
TX-1876	1
TX-1902	1
TX-1903	1
TX-1914	1
TX-1921	1
TX-1926	1
TX-1941	0
TX-1944	1
TX-1960	1
TX-1964	1
TX-1966	1
TX-1995	1
TX-2000	1
TX-2002	1
TX-2038	1
TX-2074	1
TX-2139	1
TX-2150	1
TX-2283	1
TX-2288	0
TX-2289	1
TX-2297	1
TX-2299	1
TX-2308	1
TX-2310	0
TX-2313	1
TX-2315	1
TX-2316	1
TX-2317	1
TX-2318	1
TX-2319	1
TX-2320	1
TX-2321	1
TX-2322	1
TX-2324	1
TX-2328	1
TX-2346	1
TX-2347	1
TX-2348	1
TX-2349	1
TX-2352	1
TX-2353	1
TX-2354	1
TX-2356	1
TX-2358	1
TX-2361	1
TX-2363	1
TX-2365	1
TX-2366	1
TX-2367	1
TX-2369	1
TX-2371	1
TX-2373	1
TX-2375	1
TX-2376	1
TX-2377	1
TX-2381	1
TX-2383	1
TX-2388	1
TX-2389	1
TX-2390	1
TX-2391	1
TX-2392	1
TX-2394	1
TX-2402	1
TX-2406	0
TX-2407	1
TX-2408	1
TX-2410	1
TX-2420	1
TX-2458	1
TX-2517	1
TX-2526	1
TX-2541	1
TX-2543	1
